# Supplementary material for: CD3ζ-based chimeric antigen receptors mediate T cell activation via cis- and trans-signalling mechanisms: implications for optimization of receptor structure for adoptive cell therapy
Source: PubMed Central journal article supplement (PMC3892417; doi:10.1111/cei.12216), 2014-01-03
Supplement: cei0175-0258-SD1.pdf [file cei0175-0258-SD1.pdf]

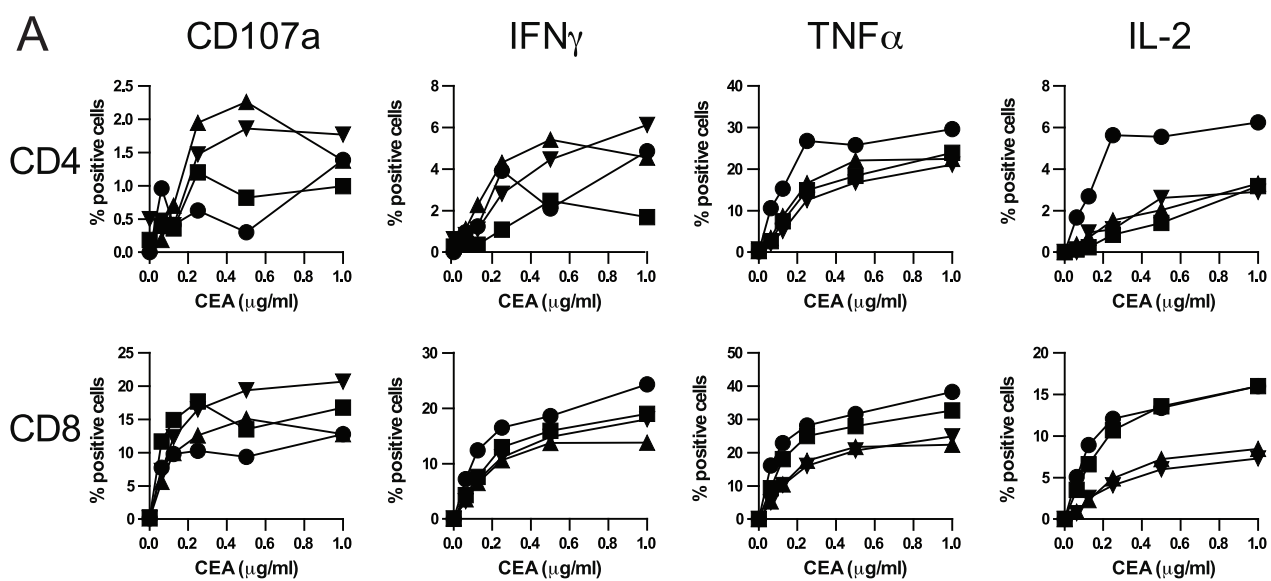

● 3 ITAM    ■ 2 ITAM    ▲ 1 ITAM    ▼ 0 ITAM

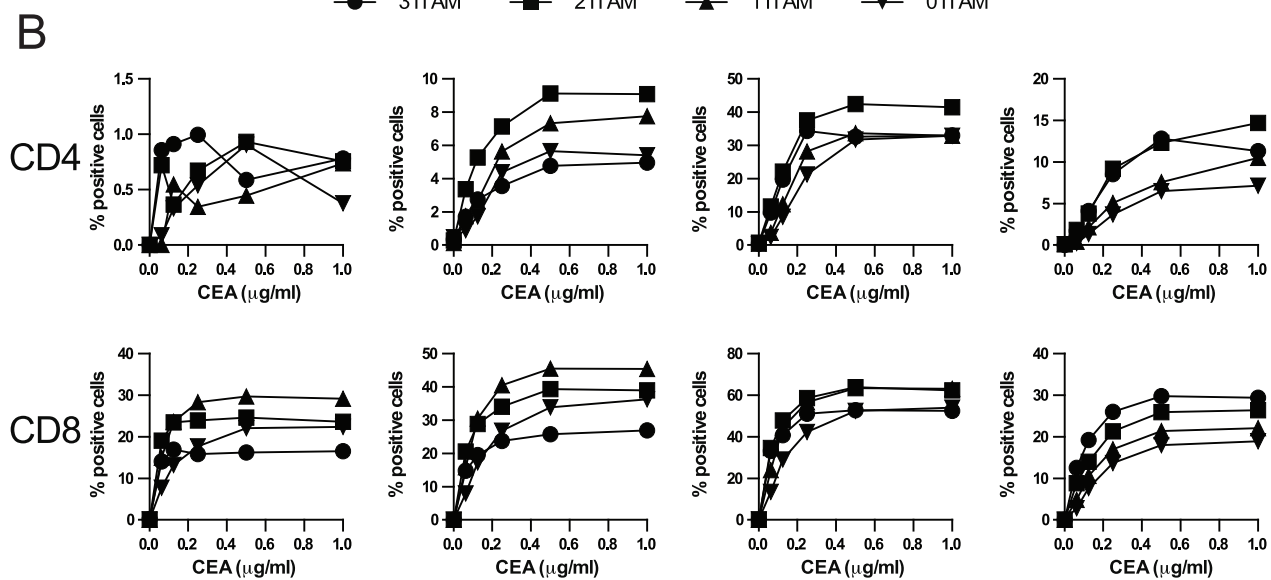

● 3 ITAM    ■ 2 ITAM    ▲ 1 ITAM    ▼ 0 ITAM
